# Supplementary material for: RNY-derived small RNAs as a signature of coronary artery disease
Source: PubMed Central journal article supplement (PMC4599655; doi:10.1186/s12916-015-0489-y), 2015-10-08
Supplement: 12916_2015_489_MOESM1_ESM.pdf [file 12916_2015_489_MOESM1_ESM.pdf]

## SUPPLEMENTAL MATERIAL

### Supplemental Tables

**Supplemental Table 6. Oligonucleotides used for RT-PCR, cloning and Northern blot analyses**

|                                            | Forward primer                          | Reverse primer                                                        |
|--------------------------------------------|-----------------------------------------|-----------------------------------------------------------------------|
| Mouse and human s-RNY1-5p (RT)             |                                         | 5'-<br>GTCGTATCCAGTGCAGGGTCCG<br>AGGTATTCGCACTGGATACGACA<br>TTGAG -3' |
| mouse s-RNY3-5p (RT)                       |                                         | 5'-<br>GTCGTATCCAGTGCAGGGTCCG<br>AGGTATTCGCACTGGATACGACA<br>ACACC -3' |
| human s-RNY3-5p (RT)                       |                                         | 5'-<br>GTCGTATCCAGTGCAGGGTCCG<br>AGGTATTCGCACTGGATACGACA<br>GTTGT -3' |
| human s-RNY4-5p (RT)                       |                                         | 5'-<br>GTCGTATCCAGTGCAGGGTCCG<br>AGGTATTCGCACTGGATACGACA<br>GTTCT -3' |
| U2 snRNA(qPCR)                             | 5'-GAAGTAGGAGTTGGAATAGGA -3'            | 5'-ACCGTTCCTGGAGGTAAGT -3'                                            |
| s-RNYs universal primer (qPCR)             |                                         | 5'- GTGCAGGGTCCGAGGT -3'                                              |
| Mouse/human s-RNY1-5p (qPCR)               | 5'- TGGTCCGAAGGTAGTGAGT -3'             |                                                                       |
| Mouse s-RNY3-5p (qPCR)                     | 5'- TTGGTCCGAGAGTAG -3'                 |                                                                       |
| Human s-RNY3-5p (qPCR)                     | 5'- TCCGAGTGCAGTGGTGT -3'               |                                                                       |
| Human s-RNY4-5p (qPCR)                     | 5'- GGTCCGATGGTAGTGGGTTAT -3'           |                                                                       |
| Human RNU48 (qPCR)                         | 5'-<br>AGTGATGATGACCCCAGGTA<br>ACTC -3' | 5'- CTGCGGTGATGGCATCAG -3'                                            |
| Mouse and humans s-RNY1-5p (Northern blot) |                                         | 5'- ACTCACTACCTTCGGACCA -3'                                           |
| Mouse and humans s-RNY1-3p (Northern blot) |                                         | 5'- AGTCAAGTGCAGTAGTGAG -3'                                           |

|                                          |  |                                                      |
|------------------------------------------|--|------------------------------------------------------|
| mouse 2'-O-Me-RNA antisense to s-RNY1-5p |  | 5'-<br>UUGAGAUAACUCACUACCUUCG<br>GACCAGCC -3'        |
| mouse 2'-O-Me-RNA antisense to s-RNY3-5p |  | 5'-<br>UAAACACCACUACUCUCGGACC<br>AACC -3'            |
| Mouse RNY1 loop (Northern blot)          |  | 5'- TTCAATCTGTAAGTACTGACTG -3'                       |
| Mouse s-RNY3-5p (Northern blot)          |  | 5'- ACCACTACTCTCGGACCAA -3'                          |
| Mouse s-RNY3-3p (Northern blot)          |  | 5'- CTGGTCAAGTGAAGCAGTG -<br>3'                      |
| Human s-RNY4-5p (Northern blot)          |  | 5'- CCCACTACCATCGGACCAG -<br>3'                      |
| U6 snRNA (Northern blot)                 |  | 5'-<br>CGTTCCAATTTTAGTATATGTGC<br>TGCCGAAGCGAGCAC-3' |
