# Supplementary material for: RNY-derived small RNAs as a signature of coronary artery disease
Source: PubMed Central journal article supplement (PMC4599655; doi:10.1186/s12916-015-0489-y), 2015-10-08

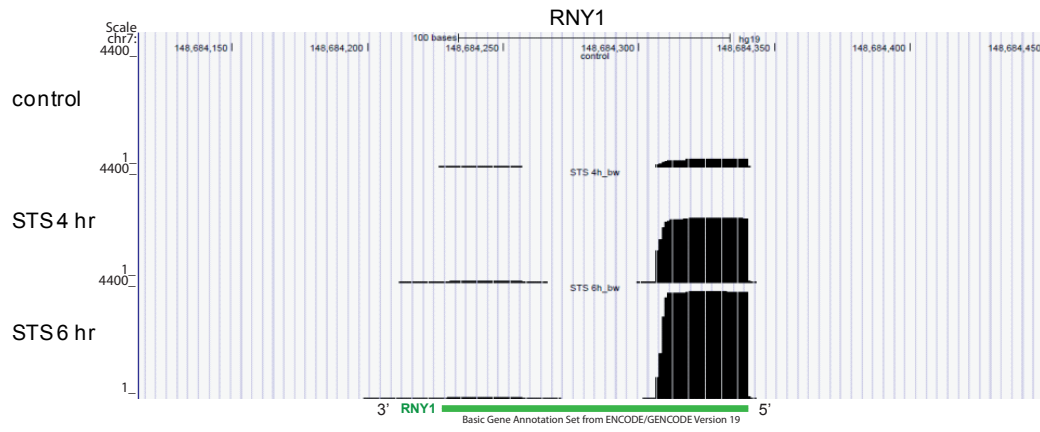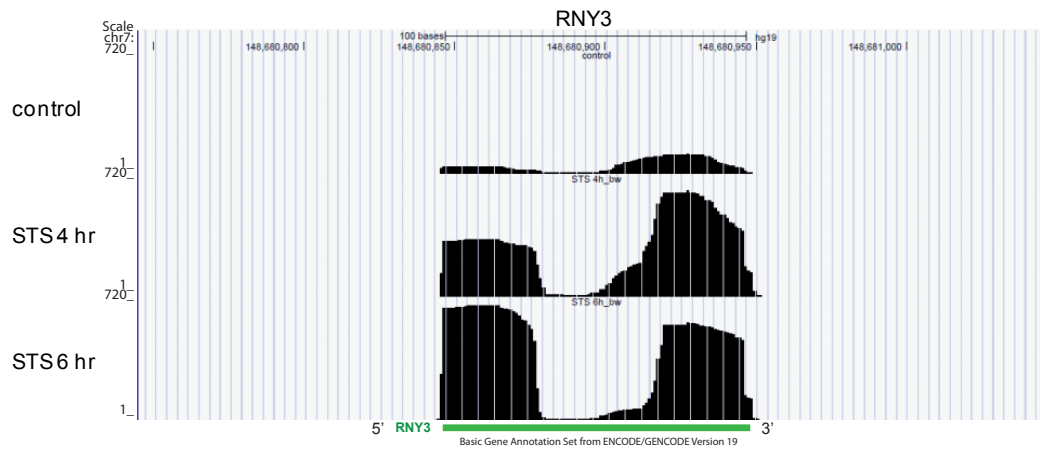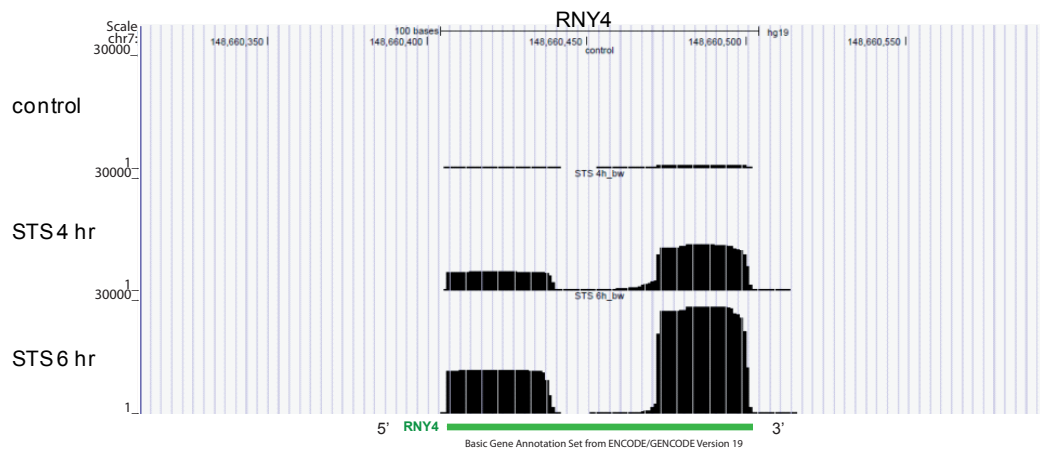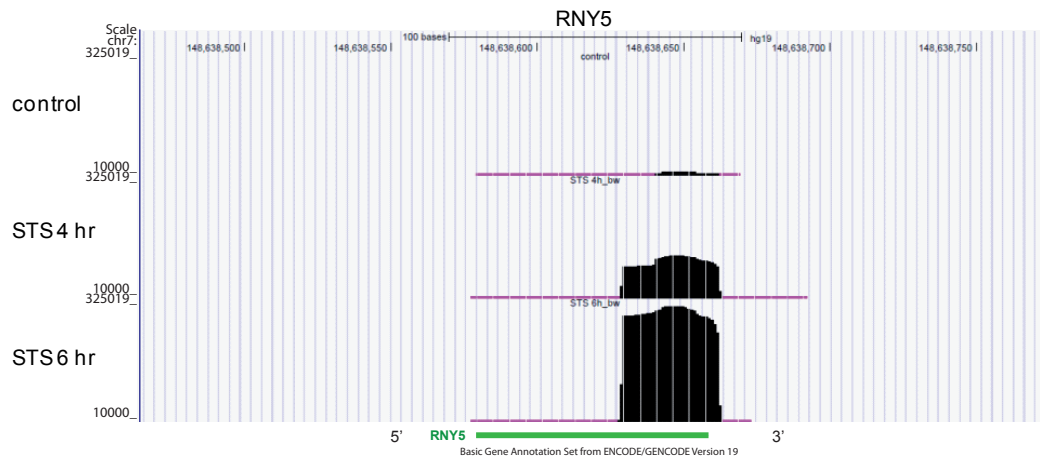

Supplement: 12916_2015_489_MOESM8_ESM.pdf [file 12916_2015_489_MOESM8_ESM.pdf]
